# Supplementary material
Source: publisher site journal article supplement (https://www.dovepress.com/get_supplementary_file.php?f=260760.docx)

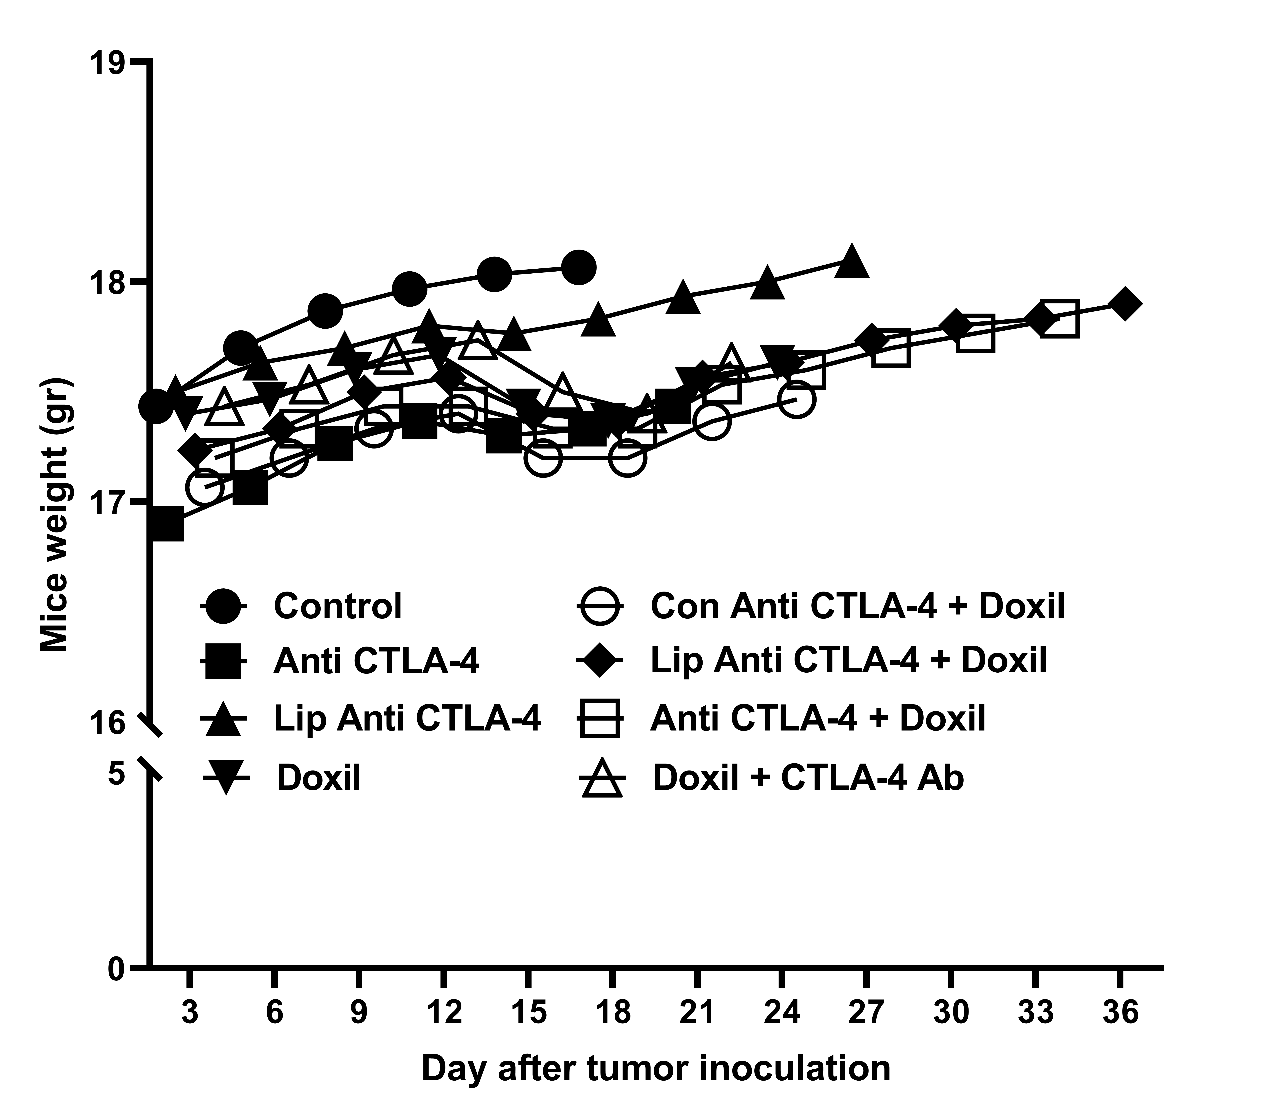


 Fig S1: Animal body weight changes during treatment.

Supplement: Supplementary file 1 [file get_supplementary_file.php]
